# Supplementary material for: Neutrophil-derived LL37 mediates IgA nephropathy via NETs-dependent mechanism
Source: Research Square preprint supplement (doi:10.21203/rs.3.rs-6636772/v1), 2025-06-16
Supplement: Supplementary file 1 [file f6d4e3a3a1f5100061aa442d.pdf]

## Contents of supplementary materials

|                                                                                                    |
|----------------------------------------------------------------------------------------------------|
| Supplemental Figure 1. HL-60 differentiated into neutrophil-like cells by DMSO.                    |
| Supplemental Figure 2. LL37/CRAMP is unlikely to be involved in pathogenic IgA overproduction.     |
| Supplemental Table 1. Baseline clinicopathologic characteristics of participants.                  |
| Supplemental Table 2. Baseline peripheral leukocytes counts of IgAN patients grouped by prognosis. |

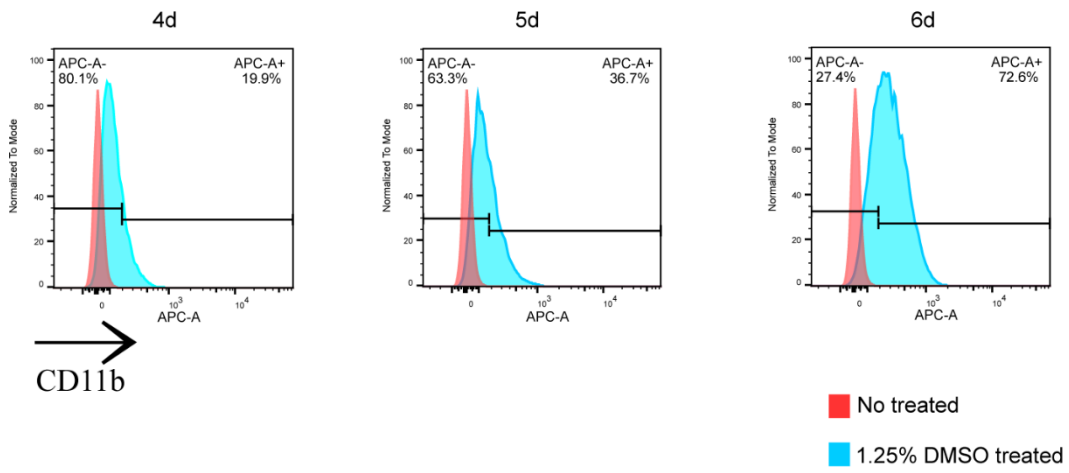

**Supplemental Figure 1. HL-60 differentiated into neutrophil-like cells by DMSO.**

**A**

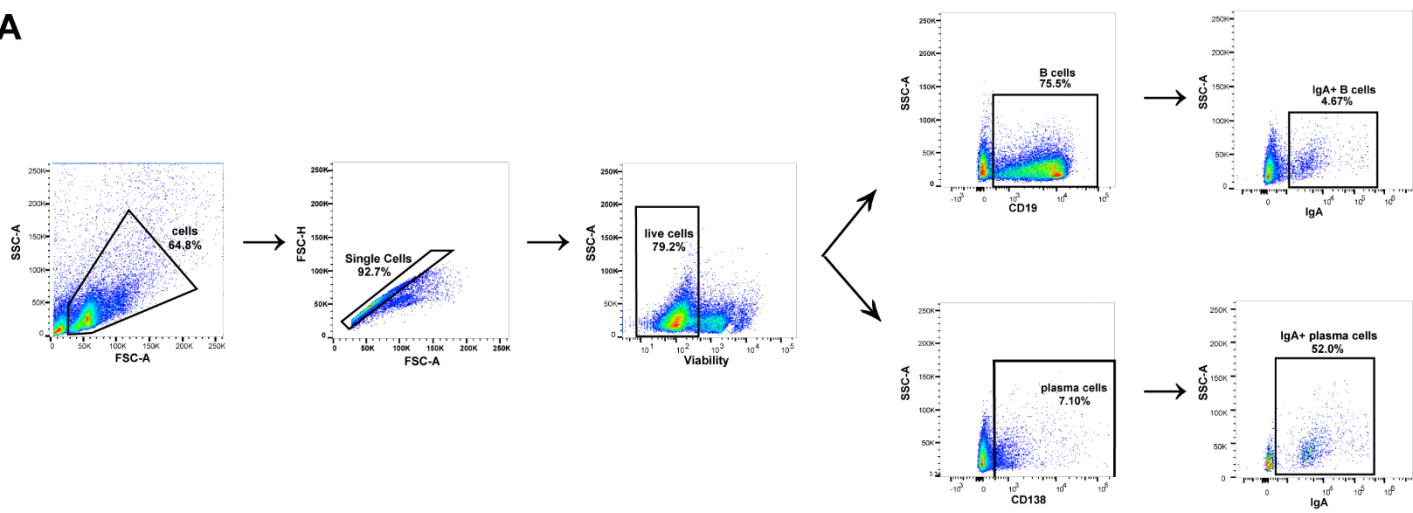

**B**

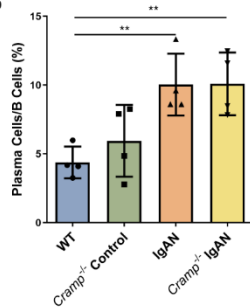

**C**

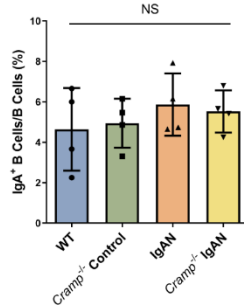

**D**

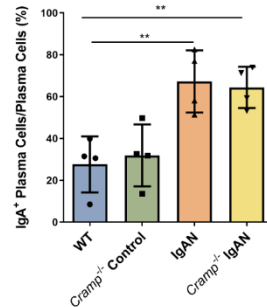

**E**

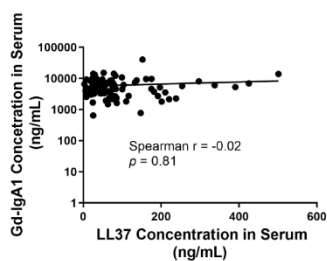

**F**

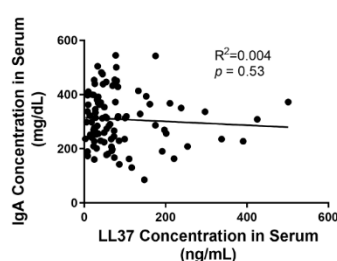

**Supplemental Figure 2. LL37/CRAMP is unlikely to be involved in pathogenic IgA overproduction.** (A) The representation gating strategy of cell sorting. (B-D) The percentage of plasma cells/B cells (B), IgA<sup>+</sup> B cells/B cells (C), and IgA<sup>+</sup> plasma cells/plasma cells (D) in the Peyer's patches of mice. (E) Correlation analysis between serum Gd-IgA1 levels and serum LL37 levels by Spearman correlation analysis. (F) Correlation analysis between serum IgA levels and serum LL37 levels by Spearman correlation analysis. \*\* $p < 0.01$ .

Supplemental Table 1. Baseline clinicopathologic characteristics of participants

|                                         | Healthy Controls( <i>n</i> =38) | IgAN-Stable( <i>n</i> =503) | IgAN-ESRD( <i>n</i> =52) | <i>P</i> value |
|-----------------------------------------|---------------------------------|-----------------------------|--------------------------|----------------|
| Male, <i>n</i> (%)                      | 7 (18.42%)                      | 232 (46.12%)                | 30 (57.69%)              | 0.001          |
| Age (yr), median (IQR)                  | 35.00 (28.25-39.75)             | 37.00 (29.00-47.00)         | 33.00 (27.25-46.75)      | 0.13           |
| UPCR (g/g), median (IQR)                | NA                              | 0.74 (0.38-1.40)            | 2.53 (1.43-3.86)         | <0.001         |
| Serum creatinine (μmol/L), median (IQR) | NA                              | 82.00 (64.00-103.00)        | 176.00 (132.25-236.50)   | <0.001         |
| eGFR (mL/min per 1.73 m <sup>2</sup> )  | NA                              | 94.60 (71.01-112.36)        | 37.15 (27.16-53.44)      | <0.001         |
| SBP (mmHg), median (IQR)                | NA                              | 125.00 (115.00-136.00)      | 143.50 (126.00-159.50)   | <0.001         |
| DBP (mmHg), median (IQR)                | NA                              | 80.00 (73.00-88.00)         | 90.50 (83.00-104.75)     | <0.001         |
| Oxford classification, <i>n</i> (%)     |                                 |                             |                          |                |
| M1                                      | NA                              | 86 (17.10)                  | 21 (41.18)               | <0.001         |
| E1                                      | NA                              | 24 (4.77)                   | 5 (9.80)                 | 0.17           |
| S1                                      | NA                              | 402(79.92)                  | 47 (92.15)               | 0.034          |
| T1-T2                                   | NA                              | 56 (11.13)                  | 38 (74.50)               | <0.001         |
| C1-C2                                   | NA                              | 169 (33.60)                 | 26 (50.98)               | 0.013          |
| Follow-up time (m), median (IQR)        | NA                              | 71.00 (50.00-93.00)         | 73.55 (42.97-88.00)      | 0.74           |

IQR, interquartile range; UPCR, urine protein to creatinine ratio; NA, not available; eGFR: estimated glomerular filtration rate; SBP: systolic blood pressure; DBP: diastolic blood pressure; M1, mesangial hypercellularity; E1, endocapillary hypercellularity; S1, segmental glomerulosclerosis; T, tubular atrophy/interstitial fibrosis; T1, T 26%–50%; T2, T >50%; C0, no crescents; C1, crescents in less than one fourth of glomeruli; C2, crescents in over one fourth of glomeruli.

Supplemental Table 2. Baseline peripheral leukocytes counts of IgAN patients grouped by prognosis

|                                         | <b>IgAN-Stable(n=503)</b> | <b>IgAN-ESRD (n=52)</b> | <b><i>P</i> value</b> |
|-----------------------------------------|---------------------------|-------------------------|-----------------------|
| Neutrophil counts (*10 <sup>9</sup> /L) | 3.50 (2.80-4.50)          | 3.85 (3.13-5.18)        | 0.019                 |
| Lymphocyte counts (*10 <sup>9</sup> /L) | 2.00 (1.60-2.40)          | 1.90 (1.60-2.45)        | 0.61                  |
| Neutrophil to lymphocyte ratio (NLR)    | 1.75 (1.36-2.31)          | 1.98 (1.66-2.77)        | 0.006                 |
| Monocyte counts (*10 <sup>9</sup> /L)   | 0.41 (0.32-0.52)          | 0.39 (0.33-0.56)        | 0.75                  |
| Eosinophil counts(*10 <sup>9</sup> /L)  | 0.13 (0.09-0.20)          | 0.19 (0.11-0.29)        | 0.004                 |
| Basophil counts (*10 <sup>9</sup> /L)   | 0.02 (0.01-0.03)          | 0.02 (0.01-0.04)        | 0.56                  |
